# Supplementary material
Source: PubMed Central journal article supplement (PMC5825235)
Supplement: NIHMS901812-supplement-Supp_info.pdf [file NIHMS901812-supplement-Supp_info.pdf]

# Supplemental Figure. 1

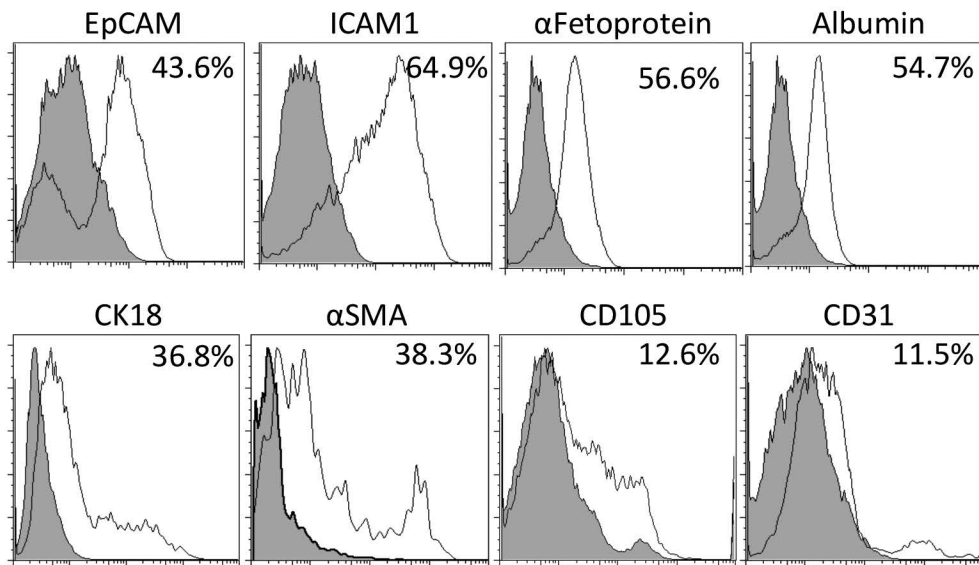

# Supplemental Figure. 2

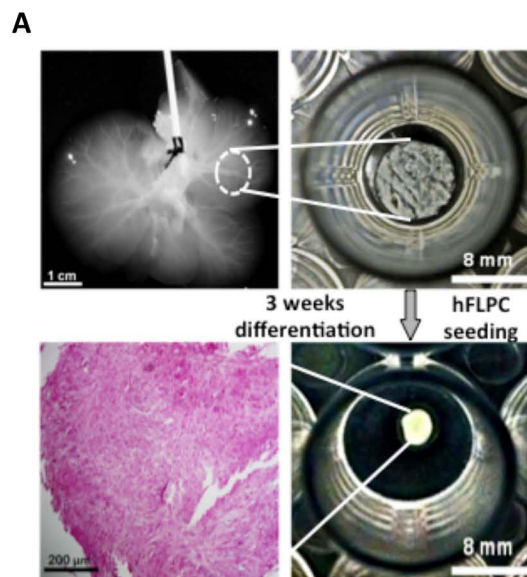

**B**

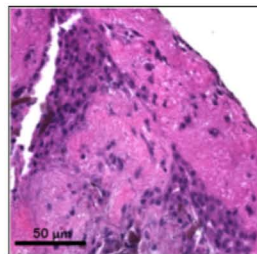

**C**

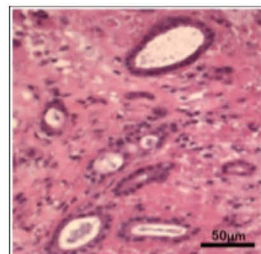

**D**

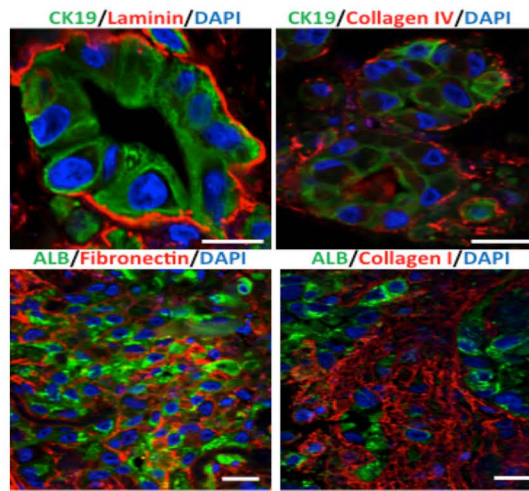

# Supplemental Figure. 3

A

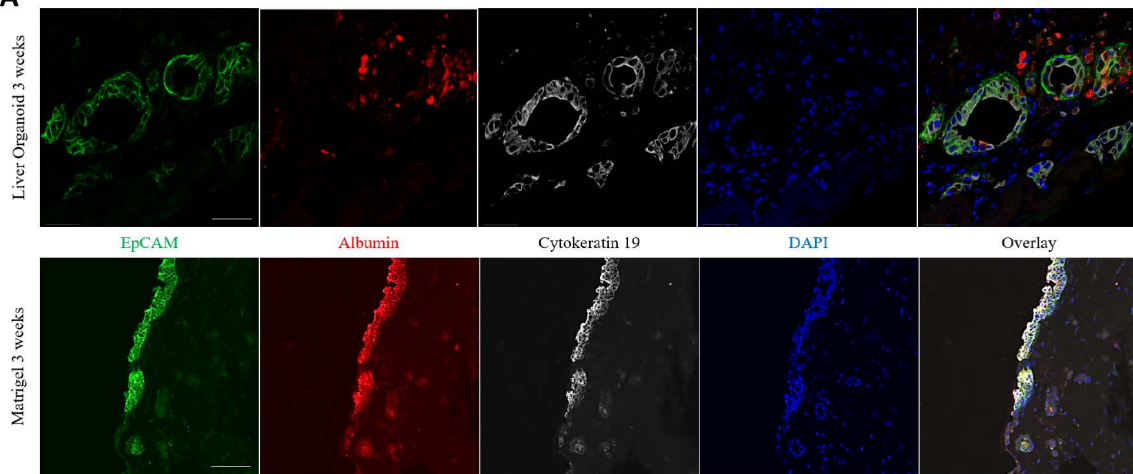

B

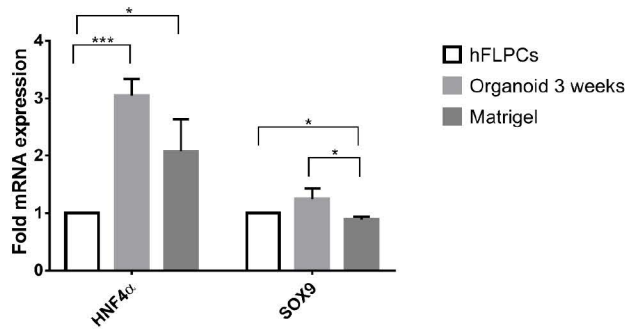

# Supplemental Figure. 4

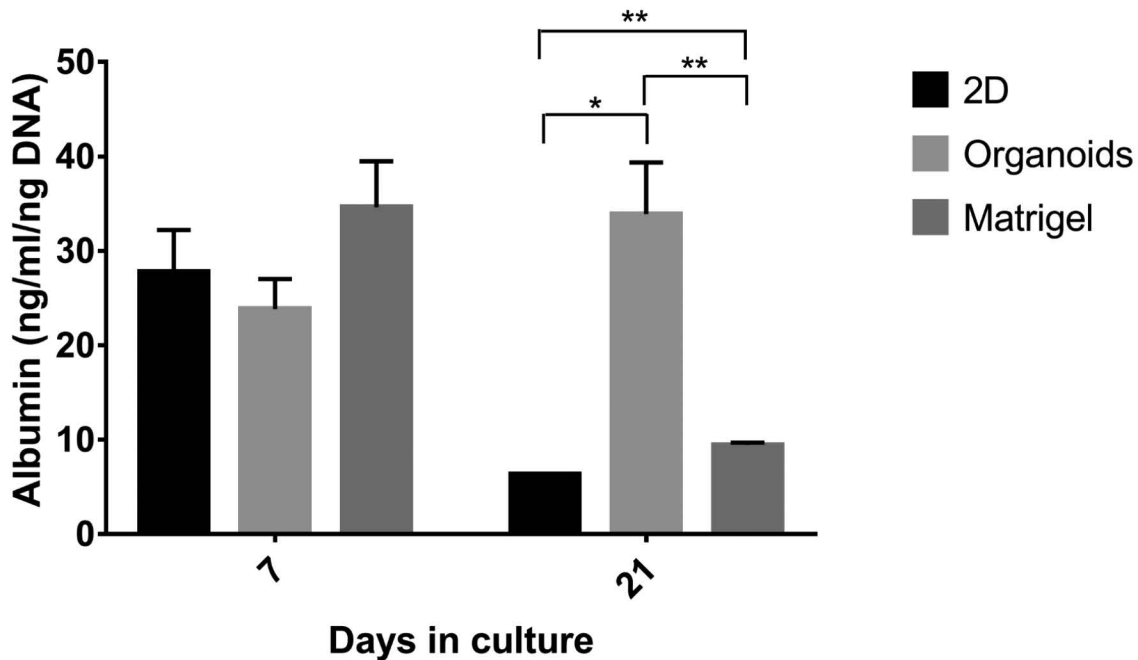

## Supplemental Figure. 5

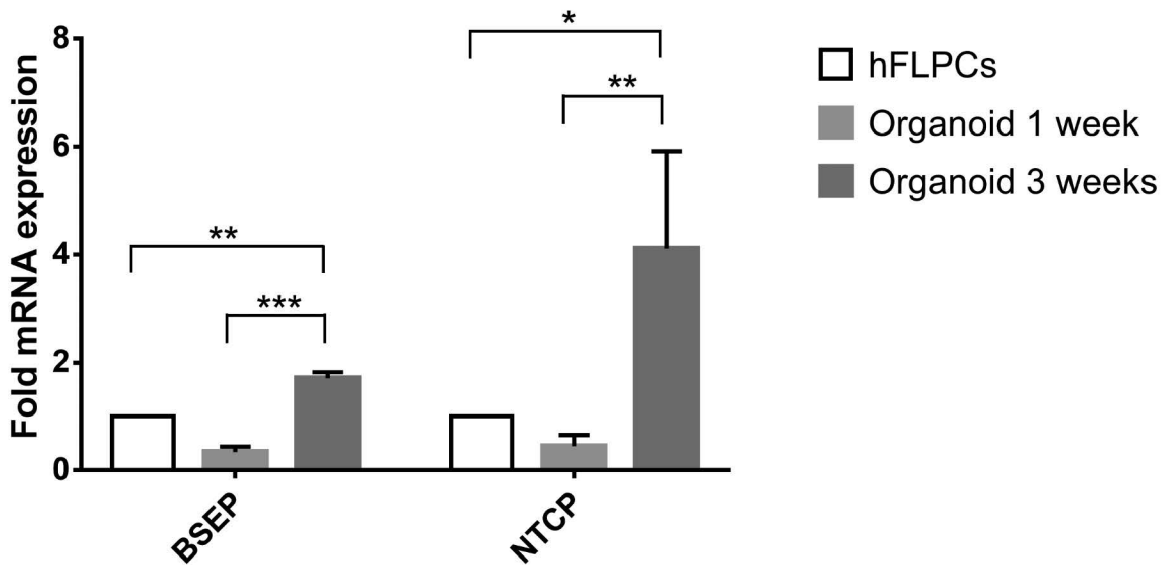

# Supplemental Figure. 6

## Liver organoids

| Substrate      | Metabolite    | 1 week differentiation                |   |    |    | 3 week differentiation                |   |    |    |
|----------------|---------------|---------------------------------------|---|----|----|---------------------------------------|---|----|----|
|                |               | Time after substrate addition (Hours) |   |    |    | Time after substrate addition (Hours) |   |    |    |
|                |               | 3                                     | 6 | 12 | 24 | 3                                     | 6 | 12 | 24 |
| Diazepam       | Temazepam     | -                                     | + | +  | +  | +                                     | + | +  | +  |
|                | Nordiazepam   | -                                     | - | +  | +  | -                                     | + | +  | +  |
| 7-OCH coumarin | 7-OH coumarin | -                                     | - | +  | +  | -                                     | - | -  | +  |

## Sandwich cultured Hepatocytes

| Substrate      | Metabolite    | Time after substrate addition (Hours) |   |    |    |
|----------------|---------------|---------------------------------------|---|----|----|
|                |               | 3                                     | 6 | 12 | 24 |
| Diazepam       | Temazepam     | +                                     | + | +  | +  |
|                | Nordiazepam   | +                                     | + | +  | +  |
| 7-OCH coumarin | 7-OH coumarin | +                                     | + | +  | +  |

# Supplemental Figure. 7

## Reference Metabolites

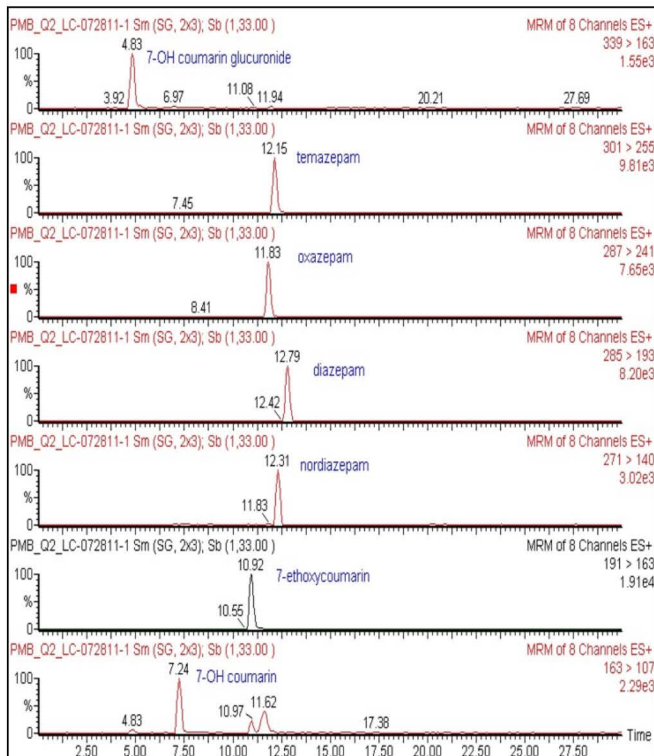

## Liver organoids

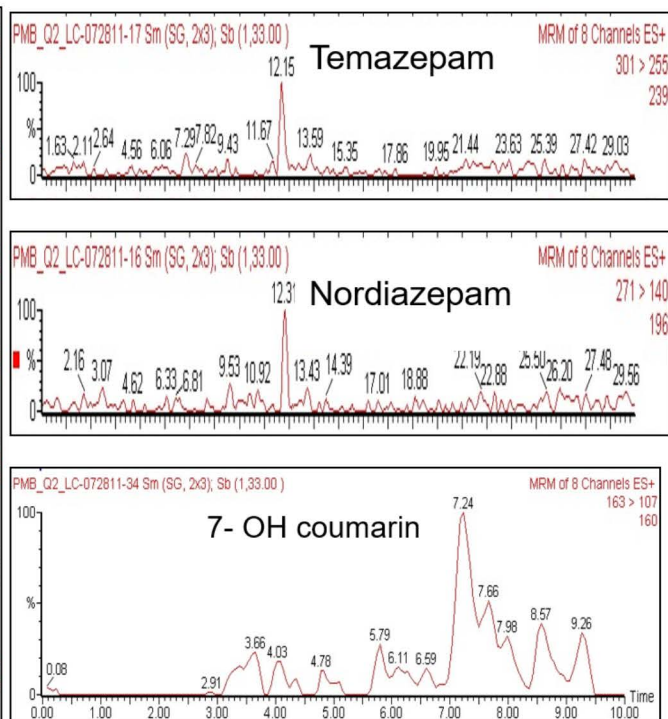

# Supplemental Figure. 8

CK19/EPCAM/DAPI

CK19/ $\beta$ -catenin/DAPI

CK19/ $\alpha$ -tubulin/DAPI

CK19/AE2/DAPI

CK19/AQ4/DAPI

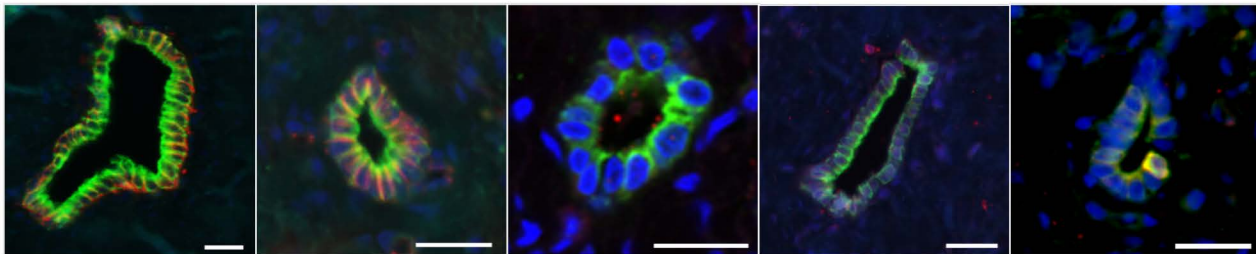

HNF4a/ALB/DAPI

CYP3A4/ALB/DAPI

CK19/ALB/DAPI

CK19/SOX9/DAPI

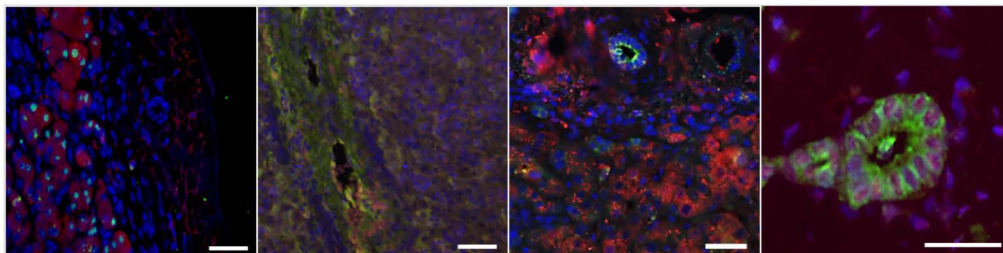



# Supplemental Figure. 9

CK19/EPCAM/DAPI

CK19/ $\beta$ -catenin/DAPI

CK19/ $\alpha$ -tubulin/DAPI

CK19/SOX9/DAPI

HNF4 $\alpha$ /ALB/DAPI

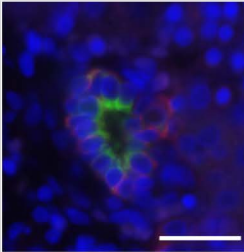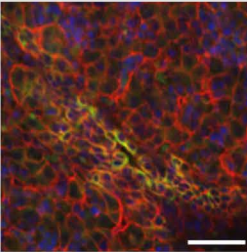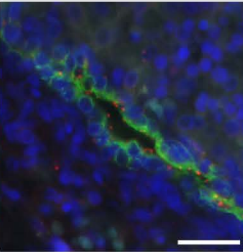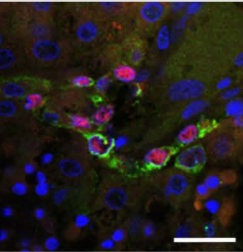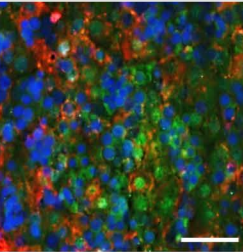

CK19/AQ4/DAPI

CK19/AE2/DAPI

SOX9/ALB/DAPI

CYP3A4/ALB/DAPI

CK19/ALB/DAPI

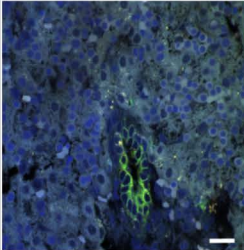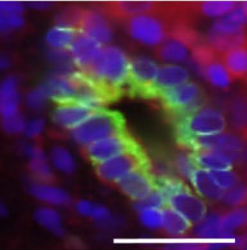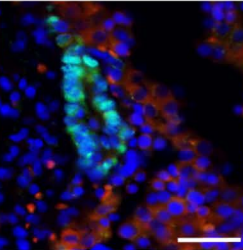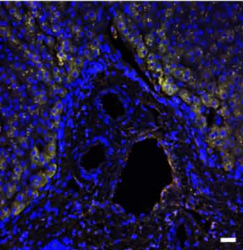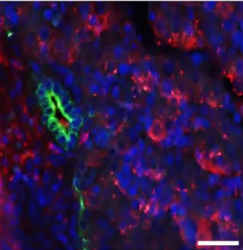

# Supplemental Figure. 10

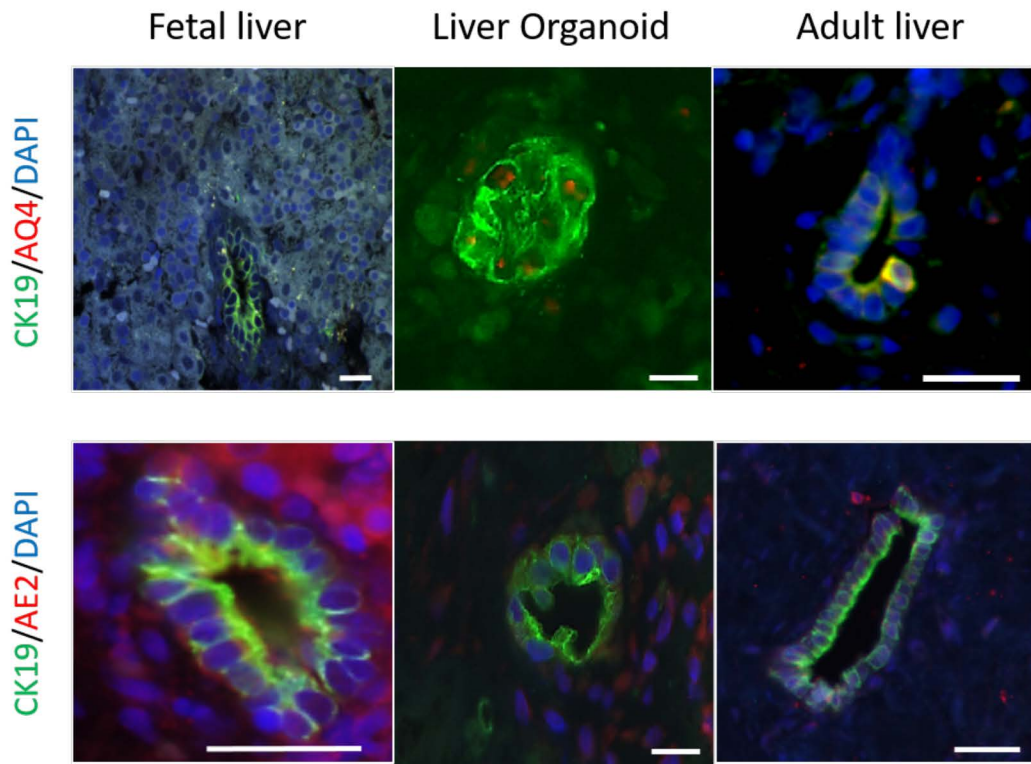

# Supplemental Figure. 11

CD31/CK19/DAPI

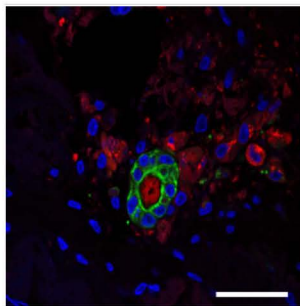

Albumin/CD31/DAPI

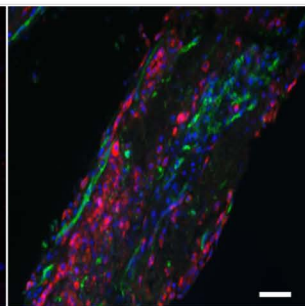

$\alpha$ -SMA/CK19/DAPI

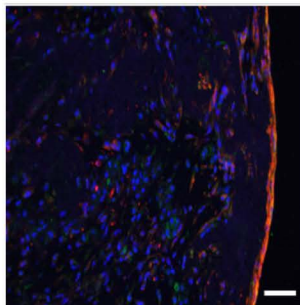

Albumin/ $\alpha$ -SMA/DAPI

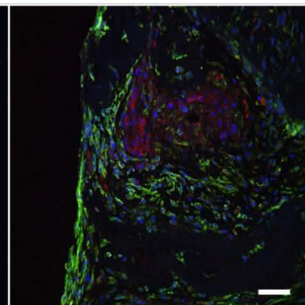

# Supplemental Figure. 12

Collagen IV/CK19/DAPI

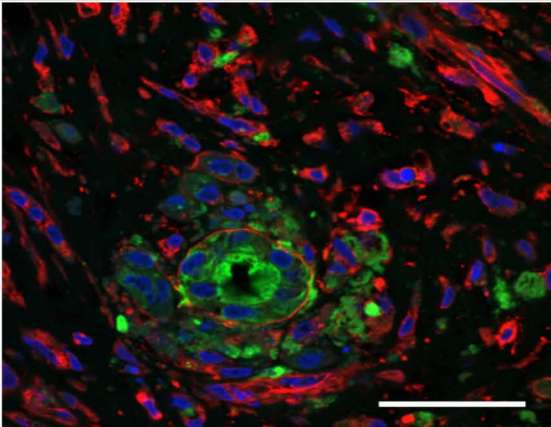

Laminin/CK19/DAPI

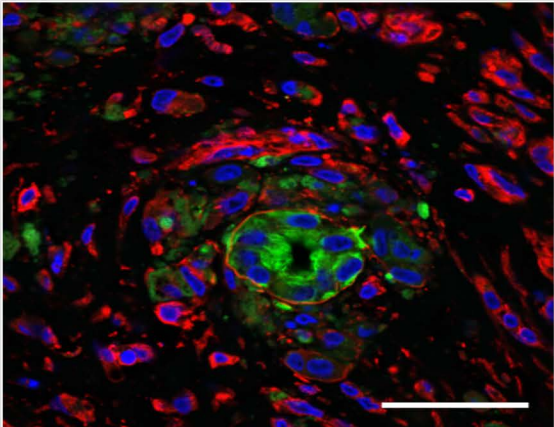

Supplemental Table 1. List of antibodies used in immunofluorescent analysis

| <b>Antibody</b>              | <b>Species</b> | <b>Vendor &amp; Catalogue Number</b> | <b>Concentration</b> |
|------------------------------|----------------|--------------------------------------|----------------------|
| AFP                          | Rabbit         | DAKO, A0008                          | 1:400                |
| Albumin                      | Goat           | Bethyl Laboratories, A80-129A        | 1:200-1:400          |
| CK19                         | Mouse          | Novocastra, NCL-CK19                 | 1:100                |
| CK19                         | Goat           | Santa Cruz, sc-33120                 | 1:100                |
| SOX9                         | Rabbit         | Santa Cruz, sc-20095                 | 1:100                |
| Laminin                      | Rabbit         | Sigma, L-9393                        | 1:50                 |
| HNF4 $\alpha$                | Rabbit         | Santa Cruz, sc8987                   | 1:50                 |
| EpCAM                        | Rabbit         | Abcam, ab124825                      | 1:50                 |
| A1AT                         | Rabbit         | Abcam, ab922                         | Ready to use         |
| ASBT                         | Rabbit         | Gift from Dr. Paul Dawson            | 1:400 – 1:1000       |
| $\alpha$ -acetylated tubulin | Mouse          | Invitrogen, 322700                   | 1:300                |
| $\beta$ -catenin             | Rabbit         | Santa Cruz, sc-7199                  | 1:1000               |
| CYP3A4                       | Rabbit         | Novus Biologicals, NBP1-95969        | 1:100                |
| AE2                          | Rabbit         | Abcam, Ab42687                       | 1:100                |
| Aquaporin 4                  | Goat           | Santa Cruz, sc-9888                  | 1:100                |
| Collagen I                   | Goat           | Southern Biotech, 1310-01            | 1:50                 |
| Collagen IV                  | Goat           | Southern Biotech, 1340-01            | 1:50                 |
| Fibronectin                  | Rabbit         | Santa Cruz, sc-9068                  | 1:100                |
| CD31                         | Mouse          | Abcam, ab9498                        | 1:25                 |
| $\alpha$ -SMA                | Rabbit         | Abcam, ab5694                        | 1:100                |

Supplemental Table 2. List of Primers used in RT-PCR studies

| Gene Name                                             | Gene Symbol   | Forward /reverse | Sequence                  | PCR product (bp) |
|-------------------------------------------------------|---------------|------------------|---------------------------|------------------|
| $\alpha$ -fetoprotein                                 | AFP           | F                | ACCATGAAGTGGGTGGAATC      | 148              |
|                                                       |               | R                | TGGTAGCCAGGTCAGGTCAGCTAAA |                  |
| Albumin                                               | ALB           | F                | GATGCTGTGAAGGGGATGTT      | 357              |
|                                                       |               | R                | TGTTGCAGCAATTTCTCAGG      |                  |
| Hepatocyte Nuclear Factor 4 alpha                     | HNF4 $\alpha$ | F                | TCAACCCGAGAAAACAAACC      | 131              |
|                                                       |               | R                | ACCTGCTCTACCAGCCAGAA      |                  |
| Aspartate Aminotransferase                            | AST           | F                | TCCAAGAACTTCGGGCTCTA      | 119              |
|                                                       |               | R                | GACCAAGTAATCCGCACGAT      |                  |
| Transferrin                                           | TF            | F                | CTACACAGGCGCTTTCAGGT      | 152              |
|                                                       |               | R                | TACCATCAAGGCACAGCAAC      |                  |
| Glucose -6- Phosphatase                               | G6PC          | F                | TCAGGGAAAGATAAAGCCGACC    | 105              |
|                                                       |               | R                | AGGTAGATTTCGTGACAGACAGAC  |                  |
| Tryptosine Aminotransferase                           | TAT           | F                | TTTGGGACCCTGTACCATTGT     | 102              |
|                                                       |               | R                | GCATTGGACTTGAGGAAGCTC     |                  |
| Cytochrome P450, Family 3, Subfamily A, Polypeptide 7 | CYP3A7        | F                | AAGTCTGGGGTATTTATGACT     | 210              |
|                                                       |               | R                | CGCTGGTGAATGTTGGAGAC      |                  |
| Cytochrome P450, Family 3, Subfamily A, Polypeptide 4 | CYP3A4        | F                | GCCTGGTGCTCCTCTATCTA      | 187              |
|                                                       |               | R                | GGCTGTTGACCATCATAAAAGC    |                  |
| Cytochrome p450, Family 2, Subfamily B, Polypeptide 6 | CYP2B6        | F                | GGCCATACGGGAGGCCCTTG      | 243              |
|                                                       |               | R                | AGGGCCCCTTGGAATTCGG       |                  |
| Cytochrome p450, Family 2, Subfamily C, Polypeptide 9 | CYP2C9        | F                | TCCTATCATTGATTACTIONCCCG  | 217              |
|                                                       |               | R                | AACTGCAGTGTTTTCCAAGC      |                  |
| Cytochrome p450, Family 2, Subfamily E, Polypeptide 1 | CYP2E1        | F                | GACTGTGGCCGACCTGTT        | 297              |
|                                                       |               | R                | ACTACGACTGTGCCCTTGG       |                  |
| Hepatocyte Nuclear Factor 6                           | HNF6          | F                | CAGCACCTCACGCCACCTC       | 369              |
|                                                       |               | R                | CAGCCACTIONCCACATCCTCCG   |                  |
| Hepatocyte Nuclear Factor 1-beta                      | HNF1 $\beta$  | F                | GAAAGCAACGGGAGATCCTC      | 279              |
|                                                       |               | R                | CCTCCACTAAGGCCTCCCTC      |                  |
| Cytokeratin 19                                        | CK19          | F                | TTTGAGACGGAACAGGCTCT      | 279              |
|                                                       |               | R                | CTCGGCCATGACCTCATATT      |                  |
| Anion Exchange Protein 2                              | AE2           | F                | GCCAAGGGCGCAGATTCTT       | 103              |
|                                                       |               | R                | CCAGGGTGCGGTGAAGTTC       |                  |
| Gamma-glutamyltransferase 1                           | GGT1          | F                | GGGGAGATCGAGGGCTATGAG     | 150              |
|                                                       |               | R                | GATGACGGTCCGCTTGTTTTTC    |                  |
| Glyceraldehyde-3-phosphate Dehydrogenase              | GAPDH         | F                | AGAAGGCTGGGGCTCATTG       | 258              |
|                                                       |               | R                | AGGGGCCATCCACAGTCTTC      |                  |

## **Supplemental Figure Legends**

### **Supplemental Figure 1. Flow cytometric (FACS) analysis of hFLPCs after 7 days in culture.**

FACS analysis shows a large population (indicated by percent of total analyzed cells) of cells positive for hepatoblast markers such as EpCAM, ICAM1,  $\alpha$ FP, ALB and CK18 and a smaller proportion of stromal cells expressing  $\alpha$ SMA and CD105 and endothelial cells expressing CD31 positive.

### **Supplemental Figure 2. Liver organoid formation inside the liver ECM discs.**

A) Schematic representation of the experimental approach for creating liver ECM discs from decellularized liver scaffold and seeding of hFLPCs. 3D liver organoids repopulated with liver cells are formed in culture over a 3-week period (H&E staining). B, C) H&E staining of section made from liver organoids after 3 weeks of differentiation shows clusters of hepatocytes (B) and ductal structures resembling bile ducts (C). D) ECM molecules organization around bile duct structures and hepatocytic clusters within the liver organoids. The organoids were stained for cytokeratin19 (CK19), albumin (ALB), laminin, fibronectin, collagen I and IV (Col I, Col IV), and for cell nuclei (DAPI).

### **Supplemental Figure 3. hFLPC differentiation in Matrigel®.**

A) Distribution and phenotypic characteristics of hFLPCs in liver ECM organoids (top panel) and Matrigel® (bottom panel) after 3 weeks of differentiation in culture. Cells were stained for epithelial cell adhesion molecule (EpCAM), albumin (ALB), cytokeratin19

(CK19) and for cell nuclei (DAPI). Scale bar is 20  $\mu\text{m}$  for top panel and 50  $\mu\text{m}$  for bottom panel. B) RT-PCR analysis of the expression of HNF4 $\alpha$  and SOX9 in liver organoids and matrigel (\* =  $p < 0.05$ , \*\*\* =  $p < 0.0005$ ).

#### **Supplemental Figure 4. Albumin secretion in liver organoids and Matrigel®.**

Albumin levels were measured by ELISA from culture medium collected after 1 week and 3 weeks of differentiation of hFLPCs in liver organoids and Matrigel® (\* =  $p < 0.05$ , \*\* =  $p < 0.005$ ).

#### **Supplemental Figure 5. Bile acid transporter expression in liver organoids.**

RT-PCR analysis of the expression of bile acid transporters BSEP and NTCP (\* =  $p < 0.05$ , \*\* =  $p < 0.005$ , \*\*\* =  $p < 0.0005$ ).

#### **Supplemental Figure 6. Metabolic activity of liver organoids.**

Metabolic activity of liver organoids after 1 and 3 weeks of differentiation and sandwich cultured hepatocytes, as measured by the conversion of Diazepam to Temazepam and Nordiazepam and of 7-ethoxy (OCH) coumarin to 7- hydroxyl (OH) coumarin.

#### **Supplemental Figure 7. Mass Spectrometry profile of metabolites formed by liver organoids.**

Liver organoids were incubated with Diazepam or 7-ethoxy coumarin and the presence of Temazepam and Nordiazepam or 7- hydroxyl (OH) coumarin, respectively, was measured



in the conditioned media by mass spectrometry (right panels). The profile of reference metabolites is shown in the left panels.

**Supplemental Figure 8.**

Immunostaining of adult human liver showing biliary ducts expressing CK19, EpCAM, acetylated  $\alpha$ -tubulin, anion exchange protein 2 (AE2), Aquaporin4 and SOX9 along with clusters of hepatocytes expressing Albumin, HNF4 $\alpha$  and CYP3A4. Scale bar is 25  $\mu$ M.

**Supplemental Figure 9.**

Immunostaining of fetal human liver showing biliary ducts expressing CK19, EpCAM,  $\beta$ -catenin, acetylated  $\alpha$ -tubulin, anion exchange protein 2 (AE2), Aquaporin4 (AQP4) and SOX9 along with clusters of hepatocytes expressing Albumin, HNF4 $\alpha$  and CYP3A4. Scale bar is 20  $\mu$ M.

**Supplemental Figure 10.**

Immunostaining panel showing comparative expression of AE2 and AQ4 in human fetal liver, liver organoids and adult liver. Scale bar is 20  $\mu$ M.

**Supplemental Figure 11.**

Immunostaining of liver organoids showing CD31 expressing endothelial cell population and  $\alpha$ -smooth muscle actin expressing stromal cell population surrounding bile ducts and hepatocyte clusters. Scale bar is 50  $\mu$ M.

**Supplemental Figure 12.**

Immunostaining of liver organoids showing Collagen IV and Laminin deposition surrounding CK19 positive bile duct structures. Scale bar is 50  $\mu$ M.
